1  
2 **Intermanual transfer of visuomotor learning is facilitated by a cognitive**  
3 **strategy**

4  
5 **Abbreviated title:** intermanual transfer facilitated by cognitive strategy

6  
7 Jack De Havas <sup>1,2,3</sup> Patrick Haggard <sup>2</sup>, Hiroaki Gomi <sup>1</sup>, Sven Bestmann <sup>4,5</sup>, Yuji  
8 Ikegaya <sup>3,6</sup> & Nobuhiro Hagura <sup>3,7</sup>

9  
10 1 NTT Communication Science Laboratories, Japan

11 2 Institute of Cognitive Neuroscience, University College London, UK

12 3 Center for Information and Neural Networks, National Institute for Information  
13 and Communications Technology, Osaka, Japan

14 4 UCL Queen Square Institute of Neurology Department of Clinical and Movement  
15 Neurosciences, University College London, UK

16 5 Wellcome Centre for Human Neuroimaging, University College London, UK

17 6 Graduate School of Pharmaceutical Sciences, Faculty of Pharmaceutical  
18 Sciences, The University of Tokyo, Tokyo, Japan

19 7 Graduate School of Frontier Biosciences, Osaka University, Osaka, Japan

20  
21 **Word count**

22 **Abstract:** 238

23 **Introduction:** 815

24 **Methods:** 2537

25 **Results:** 1675

26 **Discussion:** 1108

27 **Figure caption:** 698

28  
29  
30 Corresponding should be addressed to;

31 Jack De Havas, PhD [jdehavas@gmail.com](mailto:jdehavas@gmail.com)

32 Nobuhiro Hagura, PhD [n.hagura@nict.go.jp](mailto:n.hagura@nict.go.jp)

33

34 **Abstract**

35 Humans continuously adapt their movement to a novel environment by recalibrating  
36 their sensorimotor system. Recent evidence, however, shows that explicit planning  
37 to compensate for external changes, i.e. a cognitive strategy, can also aid  
38 performance. If such a strategy is indeed planned in external space, it should  
39 improve performance in an effector independent manner. We tested this hypothesis  
40 by examining whether promoting a cognitive strategy during a visual-force  
41 adaptation task performed in one hand can facilitate learning for the opposite hand.  
42 Participants rapidly adjusted the height of visual bar on screen to a target level by  
43 isometrically exerting force on a handle using their right hand. Visuomotor gain  
44 increased during the task and participants learned the increased gain. Visual  
45 feedback was continuously provided for one group, while for another group only the  
46 endpoint of the force trajectory was presented. The latter has been reported to  
47 promote cognitive strategy use. We found that endpoint feedback produced stronger  
48 intermanual transfer of learning and slower response times than continuous  
49 feedback. In a separate experiment, we confirmed that the aftereffect is indeed  
50 reduced when only endpoint feedback is provided, a finding that has been  
51 consistently observed when cognitive strategies are used. The results suggest that  
52 intermanual transfer can be facilitated by a cognitive strategy. This indicates that the  
53 behavioral observation of intermanual transfer can be achieved either by forming an  
54 effector-independent motor representation, or by sharing an effector-independent  
55 cognitive strategy between the hands.

56

57 **New and noteworthy**

58 The causes and consequences of cognitive strategy use for motor learning are  
59 poorly understood. We tested whether a visuomotor task learned using a strategy  
60 generalizes across effectors. Visual feedback was manipulated to enhance the use  
61 of a cognitive strategy. Learning using a cognitive strategy for one hand transferred  
62 to the task performed by the un-learned hand. Our result suggests that intermanual  
63 transfer can also result from a common cognitive strategy used to control both hands.

64

65

66 **Keywords:** visuomotor adaptation, cognitive strategy, intermanual transfer,  
67 visuomotor gain, visual feedback

68

69

## 70 Introduction

71 When hitting a tennis ball on a windy day, you might aim slightly to the side  
72 of where you want the ball to land in order to take the direction of the wind into  
73 account. As such, humans can explicitly shift the aim of their actions to compensate  
74 for external perturbations; known as a cognitive strategy. Although error-based motor  
75 learning has traditionally been considered a single implicit sensorimotor recalibration  
76 process (Kawato 1999), recent work has described the contribution of such cognitive  
77 strategies to motor learning (Krakauer et al. 2019; Miyamoto et al. 2020).

78 Cognitive strategies differ from motor adaptation in terms of how and where  
79 in the brain they are implemented (Jahani et al. 2020; Serrien et al. 2002). They also  
80 likely differ in terms of how sensory feedback is processed, with cognitive strategies  
81 producing learning that weights performance error above sensory prediction error to  
82 a greater extent than learning by adaptation (Taylor and Ivry 2012). Learning using  
83 cognitive strategies and motor adaptation overlap throughout sensorimotor tasks  
84 (McDougle et al. 2015), but can be separated by manipulating task instructions  
85 (Mazzoni and Krakauer 2006; Taylor and Ivry 2011). In this study, we investigate how  
86 cognitive strategy use generalize across effectors in motor learning, by examining  
87 the intermanual transfer of motor learning.

88 How motor adaptation tasks learned on one hand transfer to the other has  
89 been extensively studied (Anguera et al. 2007; Imamizu and Shimojo 1995; Wang  
90 and Sainburg 2003, 2006). This intermanual transfer has been traditionally ascribed  
91 to motor adaptation happening in each hemisphere (Ruddy and Carson 2013),  
92 however, whether a cognitive strategy can facilitate intermanual transfer is still under  
93 debate. Some studies have reported that the use of a cognitive strategy during motor  
94 adaptation tasks can facilitate intermanual transfer (Malfait and Ostry 2004; Werner  
95 et al. 2019), whereas others have not (Taylor, Wojaczynski, and Ivry 2011; Wang,  
96 Joshi, and Lei 2011; Wang, Lei, and Binder 2015). In these studies, cognitive  
97 strategy use has been promoted by introducing an abrupt change in the perturbation  
98 (i.e. sudden introduction of the visuomotor rotation or force field), purposefully  
99 making the participants aware of the perturbation. However, this method may  
100 potentially induce inter-individual variability in cognitive strategy use, depending on  
101 the size of the change and differences in individual sensitivity to that change (Werner,  
102 Strüder, and Donchin 2019).

103 In this study, we promote the use of cognitive strategy during motor learning  
104 by showing only the endpoint of the action (Endpoint Feedback; EPF), as opposed  
105 to showing the feedback continuously throughout the action (Continuous visual  
106 feedback; CVF). CVF provides both visual sensory prediction errors and visual  
107 performance errors relating to the entire action. EPF conversely, involves a single  
108 visual performance error signal pertaining to goal completion. Since cognitive  
109 strategies may preferentially weight performance error, we predict that restricting  
110 visual feedback to a salient performance error signal may shift the means of task  
111 learning away from motor adaptation and towards strategy use. Indeed, aftereffects  
112 upon the removal of a visuomotor perturbation, a hallmark of motor adaptation, are  
113 attenuated by EPF relative to CVF (Hinder et al. 2008; Barkley et al. 2014; Taylor et

114 al. 2014).

115 In the task, participants isometrically and ballistically exerted force on a  
116 gripped handle to control a visual bar-height on screen to reach a target height. After  
117 a baseline phase the visuomotor gain (force to bar-height transformation) increased,  
118 requiring participants to modify their motor command in order to maintain  
119 performance. A 2x2 across-subjects factorial design was used for the first experiment,  
120 with factors of visual feedback (EPF vs. CVF) and perturbation schedule (Abrupt vs.  
121 Gradual increase of visuomotor gain), conceptually mimicking previous studies  
122 (Werner, Strüder, and Donchin 2019, Taylor, Wojaczynski, and Ivry 2011; Wang,  
123 Joshi, and Lei 2011; Wang, Lei, and Binder 2015).

124 We first assessed whether EPF and abrupt gain change promoted cognitive  
125 strategies by examining reaction times. Verbal instructions to use cognitive  
126 strategies, tasks showing only EPF, and tasks where perturbations are changed  
127 abruptly, all exhibit slow response times (Benson et al. 2011; Saijo and Gomi 2010).  
128 Additionally, limiting response times reduces strategic learning, as evidenced by  
129 increased aftereffects (Haith et al. 2015). Thus, if EPF and Abrupt gain change do  
130 promote strategy use they should be associated with prolonged RT. Second, we  
131 examined the transfer rate of a gain change learned with the right-hand to the left  
132 hand. Since planning based on performance error is computed in target space  
133 (Schween et al. 2020), e.g. to aim more to the right than the target is located, such  
134 strategies should be applicable for controlling either hand. Thus, cognitive strategy  
135 use should facilitate intermanual transfer. Finally, in a separate experiment, we  
136 provided independent evidence that the type of visual feedback provided in our  
137 current force production task can indeed promote strategy use, by showing that this  
138 factor influences the size of aftereffects, consistent with previous reports (Benson et  
139 al. 2011; Haith et al. 2015; Morehead et al. 2015).

140

141

## 142 **Materials and Methods**

### 143 **Equipment**

144 Participants were seated and held a plastic handle (aligned to midline, navel height)  
145 in a power grip. The handle was instrumented with force sensors, which consisted  
146 of an optical strain gauge composed of a digital fiber sensor (FS-N10; Keyence  
147 corp.) and a limited-reflective fibre unit (FU-38; Keyence corp.) (Fujiwara et al. 2017).  
148 Participants arms were pronated and attached to custom built forearm restraints,  
149 which consisted of moulded plastic with Velcro straps at either end (see Fig. 1.). The  
150 restraints slotted into adjustable runners attached to a solid wooden board, which  
151 allowed rapid arm switching during the task. The force data from the handle was  
152 processed online by the connected PC for online presentation of the force (sample  
153 rate = 100 Hz). Experimental stimuli were created using Matlab (2017) with  
154 Psychophysics Toolbox extensions (Brainard 1997; Pelli 1997) and were presented  
155 via a flat screen monitor (27 inch LCD, 1440 × 900 pixels resolution pixels, 60 Hz  
156 refresh rate) positioned 40 cm in front of participants.

157

### 158 **Participants**

159 A total of 58 people participated in Experiment 1, of which 2 were excluded  
160 for failing to comply with the task, leaving 14 participants per group. CVF Abr: n =  
161 14, Females = 7 (age Mn = 23.8, SD = 4.8). CVF Grd: n = 14, Females = 6, (age  
162 Mn = 25, SD = 5.6). EPF Abr: n = 14, Females = 5 (age Mn = 23.4 SD = 3). EPF  
163 Grd: n = 14, Females = 5 (age Mn = 24.4 SD = 6.3).

164 A total of 33 people participated in the Experiment 2. Four participants were  
165 excluded from the analysis, two of which were due to mechanical issues and two of  
166 which were due to a failure to comply with task instructions. This left 14 participants  
167 in the CVF group (Females = 8, age Mn = 22.6, SD = 1.5) and 15 participants in the  
168 EPF group (Females = 7, age Mn = 21.3, SD = 1.8), none of whom had participated  
169 in Experiment 1.

170 Both experiments were undertaken with the understanding and written  
171 consent of each participant in accordance with the Code of Ethics of the World  
172 Medical Association (Declaration of Helsinki), and with approval of the NICT ethical  
173 committee. No adverse events occurred during either experiment.

174

175

176

177

178

179

180

181

182

183

184

185

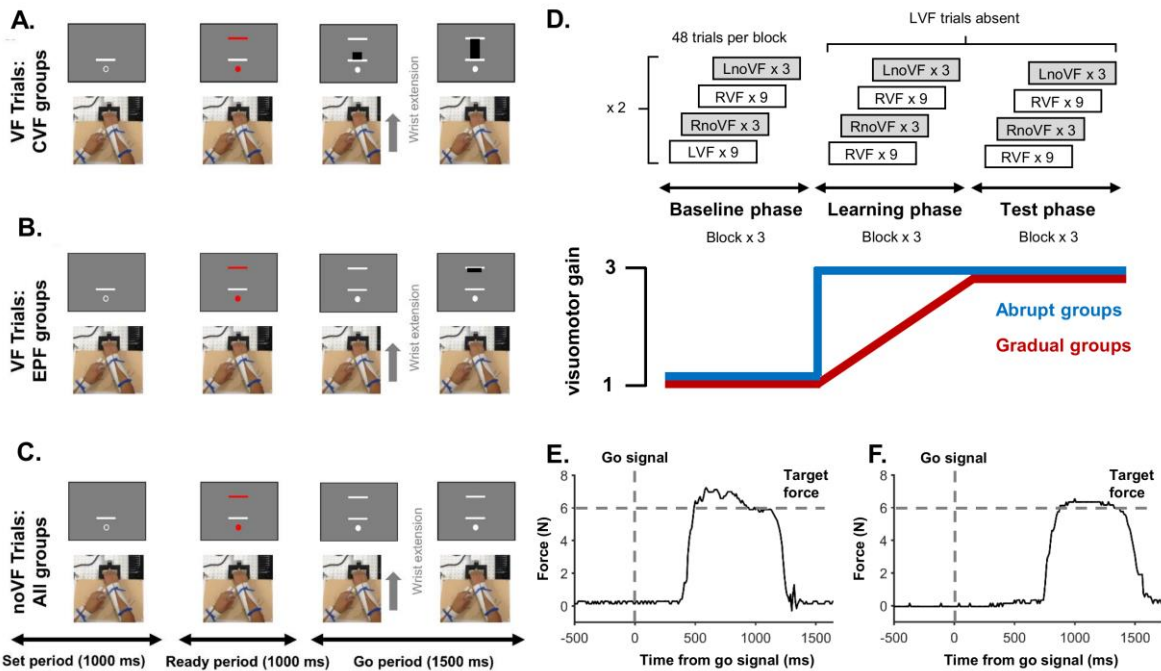

**Figure 1. Task structure and single trial results.**

**A.** Visual feedback trials in CVF groups, where isometric wrist force was continuously shown on screen as the height of a black bar.

**B.** For EPF groups, during visual feedback trials force was displayed as a static black bar, which appeared once the wrist extension was completed.

**C.** 'No visual feedback trials' were identical for all groups and involved participants making wrist extensions of appropriate strength in the absence of any visual feedback.

**D.** The experiment had a Baseline, Learning and Test phase, each with 3 blocks of 48 trials. In the Baseline phase participants alternated between sets of 9 'visual feedback trials' and 3 'no visual feedback trials', using either the right or left hand (pseudorandomised). During the Learning phase, visuomotor gain increased from 1 to 3, either abruptly (abrupt gain change groups), or via linear increments across visual feedback trials (gradual gain change groups). Left hand visual feedback trials were absent during the Learning and Test phase, meaning that the gain change was only experienced directly when using the right hand.

**E.** A single representative right hand trial from a participant in one of the CVF groups, showing force increase towards the visual target in response to the go signal.

**F.** A representative right hand trial from an EPF group participant, showing force increase towards the visual target in response to the go signal.

## Procedure

### Experiment 1

The task was to control the level of force exerted on a handle to reach a target level. The height of the bar on the monitor served as the level of exerted force, and in each trial, participants were asked to set the height of the bar to the target level by isometrically and ballistically exerting force on the handle. The task started with the baseline phase, followed by a learning phase and then the test-phase. After the



213 baseline phase, participants had to adapt to a 3x increase in visuomotor gain in the  
214 learning phase (i.e. the same amount of force applied to the handle during the  
215 baseline would produce 3x as much bar-height on screen). The increased gain  
216 remained stable during the test phase.

217 Each trial began with participants viewing a white open circle positioned under  
218 a white line while holding the handle in their relaxed position (Fig. 1.A-C.). The circle  
219 served as a fixation point, and the white bar indicated the baseline force level; the  
220 force level when the participants did not intentionally exert force on the handle. After  
221 1000ms, the fixation circle was filled with red and a red target force line appeared at  
222 one of three equi-spaced locations above the baseline. Each line height  
223 corresponded to three different force levels (3, 6, 9N during baseline phase, 1, 2, 3N  
224 during test phase). Participants prepared their response (1000ms) until the central  
225 fixation circle and the target force line turned from red to white (Go signal). In  
226 response to the Go signal, participants executed isometric wrist extensor  
227 contractions of appropriate strength as quickly as possible.

228 The experiment was designed as a 2 (visual feedback type) x 2 (perturbation  
229 schedule) between-subject factorial design, where 4 different combination of factors  
230 were assigned to 4 different group of participants.

231 For the factor of visual feedback type, in one condition, the amount of vertical  
232 force exerted on the handle was continuously presented on screen as the height of  
233 a solid black bar (Continuous Visual Feedback; CVF) (Fig. 1. A.). In the other  
234 condition, feedback was provided instead via a solid black line indicating the force  
235 level at the point in time when force velocity had reached its peak (End Point  
236 Feedback; EPF) (Fig. 1. B.). For the factor of perturbation schedule, in one condition,  
237 the visuomotor gain increased by 3x abruptly at the first trial of the learning phase  
238 (Abr). In the other condition, the gain increased gradually (linearly) over the course  
239 of learning phase (Grd).

240 The experiment began with 4 practice blocks (2 blocks per hand) of 48 trials  
241 with visual feedback (VF). The baseline phase (Fig 1. D.) consisted of 3 blocks of 48  
242 trials. Each block consisted of 4 iterations of 9 VF trials (3 x low, medium and high  
243 force targets, randomised) followed by 3 trials without visual feedback of the exerted  
244 force level (noVF) (1 x low, medium and high force targets, randomised). Two of the  
245 four sets of 9 VF trials used the right hand (RVF) and two used the left hand (LVF).  
246 Likewise, two of the four sets of 3 noVF trials used the right hand (RnoVF) and two  
247 used the left hand (LnoVF). In total there were 54 RVF trials, 54 LVF trials, 36 RnoVF  
248 trials and 36 LnoVF trials in the baseline phase. Hand order within each block was  
249 randomised.

250 Learning and test phase each had 3 blocks of 48 trials, consisting of similar  
251 types of trials as the baseline phase. However, the LVF trials were replaced with the  
252 RVF trials, thus, both phases had a total of 108 RVF trials, 36 RnoVF trials and 36  
253 LnoVF trials. This was to prevent any visual error-based learning from occurring for  
254 left hand trials while the right hand adapted to the change in the visuomotor gain.  
255 Therefore, any visual gain learning observed in the LnoVF trials could be attributed  
256 to learning transferred from the right hand. Participants had a 2-minute rest after

257 every task block. The experiment lasted 1.5hrs.

258

## 259 *Experiment 2*

260 The goal of experiment 2 was to establish whether EPF produced smaller  
261 aftereffects than CVF in our force production task, since previous literature using  
262 reaching movements suggested that strategy use causes reduced aftereffects. The  
263 force generation task in Experiment 2 was the same as Experiment 1. Once again  
264 participants exerted force on the handle to reach the same visual targets on screen.  
265 But here participants only used their right hand to respond throughout the experiment,  
266 and gain changes were identical across the two visual feedback groups (Fig. 3. A.)  
267 After a practice block, participants performed 2 blocks (45 trials per block) with a  
268 visuomotor gain of 3 (baseline phase) followed by 2 blocks in which the gain  
269 gradually decreased to 1. Then followed 4 blocks in which the gain was fixed at 1.  
270 The final two blocks with gain fixed to 1 was defined as the test phase, which was  
271 used to assess how well participants had learned the gain change. All trials up to  
272 this point only included visual feedback trials.

273 After these blocks of learning the decreased gain from the baseline, on the  
274 10<sup>th</sup> trial of block 9, the gain suddenly changed back to 3. After this sudden gain  
275 change a noVF trial was presented on every third trial for the remainder of block 9  
276 and the entirety of block 10 (total = 27 noVF trials), with the other trials being VF  
277 trials (total = 54 trials). These noVF trials, consistent with previous studies (Bond and  
278 Taylor 2015; Taylor et al. 2014), were used to assess the size of the aftereffect in the  
279 two visual feedback groups (CVF vs EPF). The experiment lasted 1 hour.

280

281

## 282 **Analysis**

### 283 *Experiment 1*

284 For every trial, the time series of the force profile was low-pass filtered using  
285 Butterworth filter (5Hz) and the force velocity was calculated. In the CVF groups,  
286 response force for each trial was the point at which the force stopped increasing and  
287 stabilised, which was determined by taking the point at which the force velocity fell  
288 below 10% of the peak force velocity for that trial. This corresponded to what  
289 participants attended to on screen and were told would be used to judge their  
290 performance accuracy. In the EPF groups, the response force for each trial was the  
291 force at the point in time when the force velocity reached its peak, since this  
292 corresponded to the feedback presented on screen. In all groups response force  
293 was multiplied by the visuomotor gain to transform the force to the visual metrics (i.e.  
294 bar height in different gain conditions). This value was transformed into an absolute  
295 difference from the target value (absolute error ratio) using the following equation;

296

$$297 \text{ absolute error ratio} = |\text{visual bar height} / \text{visual target height} - 1|$$

298

299 Here, an absolute error ratio of 0 indicates that the force produced was identical to  
300 the target level. For no visual feedback trials (noVF), to correct for force drifts before



301 movement onset the data was baseline corrected by subtracting the mean force level  
302 during the ready period from the final force level, prior to calculating the absolute  
303 error ratio.

304

305 Transfer percentages, used to assess intermanual transfer of learning, were  
306 calculated from the absolute error ratios in the LnoVF and RnoVF conditions in the  
307 following manner for each participant. First the intermanual error ratio was calculated  
308 using the absolute error ratio on LnoVF and RnoVF trials;

309

310 
$$\text{Intermanual error ratio} = |(\text{LnoVF} - \text{RnoVF}) / \text{RnoVF}|$$

311

312 Thus, if the absolute error ratio was equivalent for both hands, the *intermanual error*  
313 *ratio* would be 0, while if it was 3 x larger on the left hand the *intermanual error ratio*  
314 would be 2. To make this value more intuitive, the *transfer percentage* was then  
315 generated by calculating the *intermanual error ratio* as a percentage of the maximum  
316 intermanual error ratio during the test phase, which was 2 (i.e. an intermanual error  
317 ratio of 2 is equivalent to an error 3 x larger on the left than the right hand, because  
318 none of the 3 x gain increase had been transferred).

319

320 
$$\text{Transfer percentage} = |((2 - \text{Intermanual error ratio}) / 2) \times 100|$$

321

322 A transfer percentage of 100% therefore meant that the LnoVF absolute error ratio  
323 was the same as the RnoVF absolute error ratio, while a transfer percentage of 0%  
324 meant the LnoVF absolute error ratio was 3 x larger than the RnoVF absolute error  
325 ratio. It should be noted that by setting an upper limit on the error, we are simply  
326 normalising to this upper limit. Participants were free to exceed this limit, meaning  
327 that *Transfer percentages* can be below 0% or above 100%. The specific value used  
328 to define the maximum possible error does not change the results of the statistical  
329 tests and is used for display purposes. We used the value of 2 because this was the  
330 maximum expected error in the test phase (i.e. if no transfer occurred), and because  
331 it approximated the largest errors participants made during the practice session,  
332 before the baseline gain settings were learned.

333

334 Learning percentages for RVF and RnoVF trials were calculated separately in the  
335 same manner, in each case using the mean absolute error ratio at baseline and test.

336

337 
$$\text{Learning error ratio} = |\text{Test} - \text{Baseline} / \text{Baseline}|$$

338

339 
$$\text{Learning percentage} = |((2 - \text{Learning error ratio}) / 2) \times 100|$$

340

341 Group differences in transfer percentage at baseline and test, RVF learning  
342 percentage at test, and RnoVF learning percentage at test were all assessed using  
343 2 x 2 between subject's ANOVA, with factors of visual feedback type (CVF vs EPF)  
344 and perturbation schedule (Gradual vs Abrupt). We also calculated transfer and

345 learning percentages throughout the experiment by applying the above formulae to  
346 every trial. These values were smoothed for display purposes via averaging within a  
347 5-trial moving window.

348 Reaction times (RT) were calculated for every trial by taking the point in time  
349 after the go signal where the force level rose above 4x the SD of the force during the  
350 ready period. Mean RT at baseline and test were compared across groups using a  
351 2 x 2 x 2 mixed ANOVA, with the within subject's factor of phase (baseline vs test)  
352 and the between subject's factors of visual feedback type and perturbation schedule.  
353 Trial level RT data was also smoothed for display purposes via averaging within a 5-  
354 trial moving window.

355 Trials were automatically rejected from the analyses based on absolute error  
356 ratio if during the 1500ms go period, the participant failed to increase force above  
357 10% of the target force level for that trial. We also rejected trials where peak force  
358 velocity occurred after the go period (i.e. late responses > 1500ms). Trials were  
359 rejected from the RT analyses if force increases were detected after the go period  
360 (late responses > 1500ms) or if RT was classified as being < 100ms. There were no  
361 significant differences between the CVF and EPF groups in terms of the mean  
362 percentage of trials rejected per participant from the error ratio analyses (Mn = 8.77%,  
363 SD = 4.96% vs Mn = 11.58%, SD = 7.34%;  $t(54) = -1.649$ ,  $p = 0.105$ ) or the RT  
364 analyses (Mn = 15.28%, SD = 9.09% vs Mn = 19.96%, SD = 12.44%;  $t(54) = -1.58$ ,  
365  $p = 0.12$ ).

366

## 367 *Experiment 2*

368 RT and absolute error ratio were calculated in the same manner as  
369 Experiment 1, as were the learning percentages for RVF trials. We used the same  
370 trial exclusion criteria as Experiment 1. There were no significant differences  
371 between the CVF and EPF groups in terms of the mean percentage of trials rejected  
372 in each participant from the error ratio analyses (Mn = 1.02%, SD = 0.64% vs Mn =  
373 0.81%, SD = 0.9%;  $t(27) = 0.685$ ,  $p = 0.499$ ) or the RT analyses (Mn = 10.94%, SD  
374 = 14.02% vs Mn = 4.79%, SD = 6.99%;  $t(27) = 1.511$ ,  $p = 0.142$ ).

375 To specifically to assess the size of the aftereffect, we analysed the signed  
376 error ratio (i.e. error ratio calculated without converting to absolute values). This was  
377 done because during the aftereffect phase the gain suddenly increased from 1 to 3  
378 and we were interested in the degree to which participants overshot the target force  
379 level, since this would reflect the degree to which they had adapted to the lower gain  
380 setting during the learning and test phases. We determined the size of the aftereffect  
381 for each participant for both VF and noVF trials by subtracting the mean signed error  
382 ratio during the baseline phase.

383 We compared mean RT throughout the entire experiment across the two  
384 visual feedback groups. We also specifically assessed whether the gradual gain  
385 change interacted with group by comparing RT change (test – baseline) in each  
386 visual feedback group, and whether the sudden gain change before the aftereffect  
387 phase interacted with group by comparing RT change (aftereffect RVF RT – test RVF  
388 RT) in each visual feedback group. Independent samples t-tests were conducted on

389 all the variables of interest. Data were smoothed for presentation purposes in the  
390 same manner as Experiment. 1.

391

392

393

394

## 395 **Results**

### 396 *Reaction times were slower for EPF trials*

397 Cognitive strategy use has been associated with prolonged reaction times,  
398 possibly due to an increased planning load (Haith et al. 2015; Saijo and Gomi 2010).  
399 We found that RT for RVF trials was longer for the EPF groups than the CVF groups  
400 throughout the experiment (Fig. 2. D.). This manifested as a significant main effect  
401 of visual feedback type when baseline and test phases analyzed for all 4 groups  
402 ( $F(1,52) = 7.041$ ,  $p = 0.011$ ). It also held when the baseline ( $F(1,52) = 5.761$ ,  $p =$   
403  $0.020$ ),  $\eta^2 = 0.1$ ) and test ( $F(1,52) = 7.061$ ,  $p = 0.010$ ,  $\eta^2 = 0.12$ ) phases were  
404 analysed separately. There was a trend towards RT getting faster from baseline to  
405 test (Main effect of phase:  $F(1,52) = 3.587$ ,  $p = 0.064$ ), but no significant interaction  
406 between visual feedback type and phase ( $F(1,52) = 0.032$ ,  $p = 0.858$ ). Therefore,  
407 participants responded more slowly when EPF was available on visual feedback  
408 trials throughout the task, possibly by incorporating a cognitive strategy for  
409 movement planning.

410

### 411 *Greater intermanual transfer of learning for end point feedback*

412 Our main interest was whether a putative shift towards a cognitive strategy  
413 has any influence on the intermanual transfer of visuomotor adaptation. We  
414 calculated the transfer percentage, which was the ratio between the absolute error  
415 ratio of left and right no visual feedback trials, expressed as a percentage of the  
416 maximum error. In the learning and test phase, only the right hand was exposed to  
417 the perturbation (i.e. visual feedback), but not the left. A transfer percentage close  
418 of 100% indicates comparable performance on both hands in the absence of visual  
419 feedback, i.e. that all learning on the right hand has been transferred to the left. A  
420 transfer percentage of 0% means no learning has been transferred (LnoVF error is  
421 3x larger than RnoVF), while 50% indicates half the learning has been transferred  
422 (LnoVF error is 2x larger than RnoVF).

423 Transfer percentages at test in the EPF groups were higher than those in the  
424 CVF groups (EPF Grad. Mn = 84.64%, EPF Abr. Mn = 85.56% vs. CVF Grad. Mn =  
425 30.5%, CVF Abr. Mn = 32.43%; Fig. 2. A. right box plot). ANOVA performed between  
426 groups revealed that there was a significant main effect of visual feedback group on  
427 the transfer percentage at test ( $F(1,52) = 31.194$ ,  $p < 0.001$ ,  $\eta^2 = 0.37$ ). As can be  
428 seen from the trial level analysis (Fig. 2. A.), transfer percentages in the EPF groups  
429 during the learning phase showed some improvement until reaching a plateau  
430 around the start of the test phase. Conversely, transfer percentages in CVF groups  
431 were lower, and plateaued earlier during the learning phase.

432 The transfer results were not due to baseline differences in left and right hand

433 performance when the visual feedback was absent. Baseline transfer percentages  
434 were close to 100% in all groups and did not significantly differ from one another  
435 ( $F(1,52) = 2.95$ ,  $p = 0.092$ ; Fig. 2. A. left box plot).

436

437 *Visual gain change was successfully learned for all groups*

438 To determine that the gain change was successfully learned by all participants  
439 we calculated the learning percentage on RVF trials, which was the ratio between  
440 the absolute error ratio at a given point in time and the absolute error ratio at baseline,  
441 expressed as a percentage of the maximum error during the test phase (i.e. 100% =  
442 complete gain learning; 0% = gain not learned, error ratio is 3x larger than baseline  
443 error ratio). Learning percentages on RVF trials plateaued before the test phase in  
444 all groups (Fig. 2. B.), were moderately high in all groups (~80%), and did not  
445 significantly differ across groups ( $F(1,52) = 0.06$ ,  $p = 0.807$ ; Fig. 2. B. box plot). Thus,  
446 the greater transfer percentage found in the EPF groups could not be ascribed to  
447 better learning of the gain change.

448

449 *Right hand no visual feedback learning did not differ across groups*

450 Learning percentages on RnoVF trials (Fig. 2. C.) were markedly worse than  
451 those seen for RVF, which was expected because visual feedback was not available  
452 to aid performance. Importantly, during the test phase RnoVF learning percentages  
453 did not differ across EPF and CVF groups ( $F(1,52) = 1.764$ ,  $p = 0.19$ ; Fig. 2. C. box  
454 plot). RnoVF performance at test gives an indication of how well the forward model  
455 has been updated during the learning phase. As such, if the EPF group had  
456 performed significantly better than the CVF group on these trials, one could conclude  
457 that that forward model learning was more pronounced with EPF. However, this was  
458 not the case and only the amount of intermanual transfer was found to be improved  
459 by EPF.

460

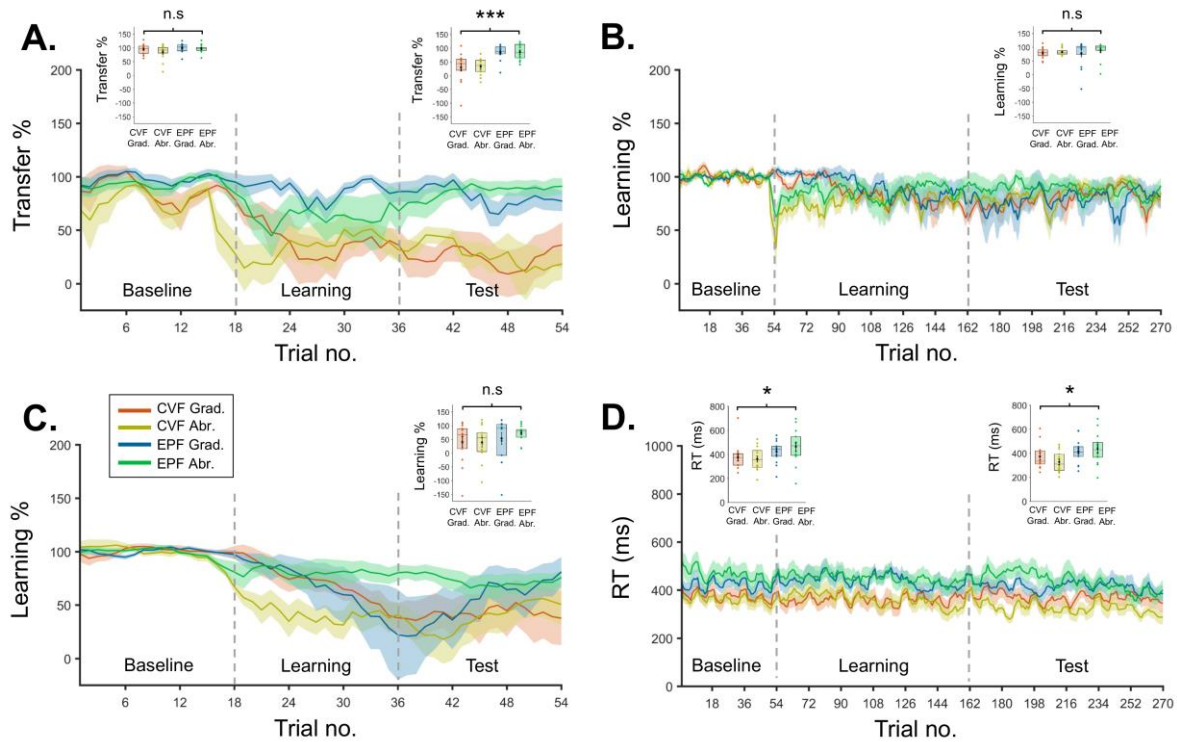

461

462

463

### Figure 2. Experiment 1. Transfer, Learning and RT results

464 **A.** Percentage transfer between RnoVF and LnoVF in each group across the entire

465 experiment. In the EPF groups the amount of transfer returned to around 85% during the

466 learning phase, but in the CVF groups remained around 30% through to the end of the

467 test phase. Insert box plots show that mean transfer % at baseline did not differ across

468 groups, but was significantly higher in the EPF groups than the CVF groups during the

469 test phase (n.s.= not significant, \*\*\* p < 0.001).

470 **B.** Percentage learning of gain change relative to baseline performance on RVF trials in

471 each group across the entire experiment. Insert box plot shows that learning rates did not

472 significantly differ across groups during the test phase (n.s. = not significant).

473 **C.** Percentage learning of gain change relative to baseline performance on RnoVF trials in

474 each group across the entire experiment. Insert box plot shows that the mean performance

475 at test did not differ across groups (n.s. = not significant).

476 **D.** Response times on RVF trials for all groups across the entire experiment. RT was slower

477 in EPF compared to CVF groups at baseline and test (\* p < 0.05).

478

479

### 480 *No difference observed between Abrupt and Gradual perturbation schedules*

481 No significant differences were observed when comparing abrupt and gradual

482 perturbation schedules for all measures of RT and absolute error ratio. When

483 comparing RVF RT at baseline and test, there was no significant main effect of

484 perturbation schedule ( $F(1,52) = 0.001$ ,  $p = 0.975$ ) and no significant interaction

485 between visual feedback type and perturbation schedule ( $F(1,52) = 1.242$ ,  $p =$



486 0.270). There was also no interaction between phase and perturbation schedule  
487 ( $F(1,52) = 1.742$ ,  $p = 0.193$ ), and no significant visual feedback type x perturbation  
488 schedule x phase interaction ( $F(1,52) = 0.013$ ,  $p = 0.909$ ). When baseline and test  
489 were considered separately, at baseline there was no significant main effect of  
490 perturbation schedule ( $F(1,52) = 0.181$ ,  $p = 0.673$ ) or perturbation x visual feedback  
491 type interaction ( $F(1,52) = 0.993$ ,  $p = 0.324$ ), and at test there was no significant  
492 main effect of perturbation schedule ( $F(1,52) = 0.152$ ,  $p = 0.699$ ) or perturbation x  
493 visual feedback type interaction ( $F(1,52) = 1.274$ ,  $p = 0.264$ ).

494 Likewise, transfer percentages at test did not significantly differ according to  
495 perturbation schedule ( $F(1,52) = 0.022$ ,  $p = 0.883$ ), and there was no significant  
496 perturbation schedule x visual feedback type interaction ( $F(1,52) = 0.003$ ,  $p = 0.958$ ).  
497 Baseline transfer percentage did not show a main effect of perturbation schedule  
498 ( $F(1,52) = 1.665$ ,  $p = 0.203$ ), nor a significant perturbation schedule x visual  
499 feedback type interaction ( $F(1,52) = 0.529$ ,  $p = 0.471$ ). RVF learning percentage also  
500 did not show a main effect of perturbation schedule ( $F(1,52) = 0.786$ ,  $p = 0.380$ ),  
501 nor a significant perturbation schedule x visual feedback type interaction ( $F(1,52) =$   
502  $0.148$ ,  $p = 0.720$ ). Likewise, for RnoVF, learning percentages did not show a main  
503 effect of perturbation schedule ( $F(1,52) = 0.262$ ,  $p = 0.611$ ), nor a significant  
504 perturbation schedule x visual feedback type interaction ( $F(1,52) = 0.376$ ,  $p = 0.542$ ).

505

### 506 *Experiment 2 results*

507 The purpose of Experiment 2 was to determine whether EPF was associated  
508 with smaller aftereffects than CVF, since smaller aftereffects have been associated  
509 with strategy use (Benson et al. 2011; Haith et al. 2015; Morehead et al. 2015). This  
510 was confirmed by assessing noVF trials after a sudden increase in visuomotor gain,  
511 which raised the gain back to baseline levels, following an extended period of  
512 adaptation to a gradually introduced lower level of visuomotor gain (Fig.3. A & B.).  
513 On noVF trials, the degree of overshoot was significantly larger for the CVF  
514 compared to the EPF group (Mn = 0.58, SD = 0.31 vs Mn = 0.26, SD = 0.21;  $t(27) =$   
515  $3.247$ ,  $p = 0.003$ , Cohen's  $d = 1.2$ ), indicating a larger aftereffect in the CVF group.  
516 Such aftereffects are hypothesised to be attenuated when participants use a strategy  
517 rather than adaptation to maintain performance during learning. On this account,  
518 participants in the EPF group displayed smaller aftereffects because they made  
519 greater use of a cognitive strategy throughout the task.

520 On VF trials participants in both groups were able to rapidly reduce their  
521 degree of target overshoot and there were no significant differences between the  
522 CVF and EPF groups (Mn = 0.26, SD = 0.18 vs Mn = 0.29, SD = 0.25;  $t(27) = -0.395$ ,  
523  $p = 0.696$ ; Fig 3. C.).

524 We also examined how well the initial gradual gain decrease was learned.  
525 The learning percentage, based on the absolute error ratio, was close to 100% for  
526 both groups (Fig. 3. D.), but was significantly higher in the CVF group compared to  
527 the EP group (CVF Mn = 109.24%, SD = 10.09% vs EPF Mn = 95.97%, SD =  
528 15.44%;  $t(27) = 2.719$ ,  $p = 0.011$ , Cohen's  $d = 1.02$ ). Thus both groups learned the



529 gradual gain change, but participants in the CVF group actually performed slightly  
530 better at test than baseline, while those in the EPF group performed slightly worse  
531 at test than baseline.

532 We replicated the finding from Experiment 1 that EPF was associated with  
533 longer RT than CVF (Mn = 506.14ms, SD = 113ms vs Mn = 340.25ms, SD = 81.3ms;  
534  $t(27) = 4.509$ ,  $p < 0.001$ , Cohen's  $d = 1.69$ ; Fig. 3. E. left box plot), again consistent  
535 with the hypothesis that EPF promotes strategy use. As with Experiment 1, there  
536 was a general tendency for participants to respond faster from baseline to test, but  
537 this this speeding of responses did not differ between CVF and EPF groups (Mn = -  
538 53.08ms, SD = 53.98ms vs Mn = -83.67ms, SD = 41.73ms;  $t(27) = 1.714$ ,  $p = 0.098$ ).

539 Interestingly, participants in the CVF group tended to increase RT after the  
540 sudden gain change (aftereffect phase) on VF trials, while those in the EPF groups  
541 maintained their RT (Mn = 61.95ms, SD = 90.93ms vs Mn = -7.68ms, SD = 65.90ms;  
542  $t(27) = 2.373$ ,  $p = 0.025$ , Cohen's  $d = 0.88$ ; Fig. 3. E. right box plot). Indeed, by the  
543 end of the aftereffect phase group mean CVF RT rose to be similar to EPF RT. These  
544 results might indicate that the sudden gain change resulted in a greater reliance on  
545 strategy use in the CVF group. When questioned at the end of the experiment all  
546 participants in both groups reported being aware of the sudden gain increase  
547 (aftereffect phase), whilst remaining unaware of the earlier gradual gain decrease.  
548

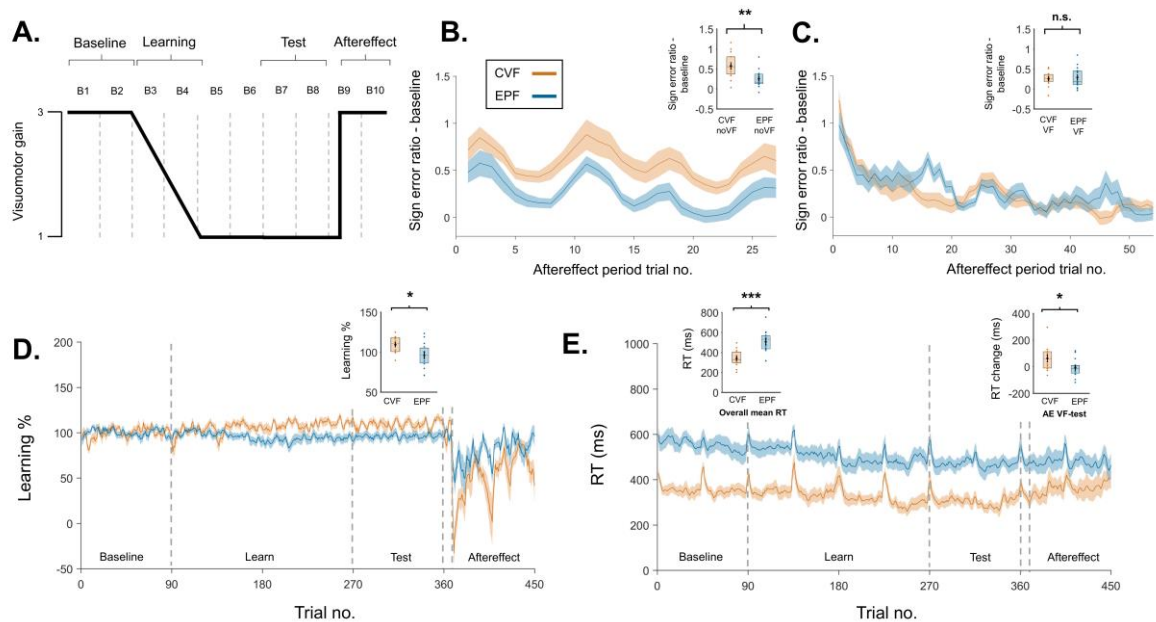

549

### 550 **Figure 3. Design and results of Experiment 2.**

551 **A.** Design of Experiment 2 showing how visuomotor gain changed across blocks (B1-B10).  
552 On the 10<sup>th</sup> trial of B9 there was sudden gain change which returned the gain to the baseline  
553 level. During this aftereffect phase trials alternated between 2 VF trials followed by 1 noVF  
554 trial.  
555 **B.** Signed error ratio after subtracting baseline values for noVF trials in the aftereffect phase,

556 showing larger aftereffect for CVF than EPF groups. Box plot shows that the degree of  
557 overshoot was significantly higher for the CVF group relative to the EPF group, indicative of  
558 a greater aftereffect (\*\*  $p < 0.01$ ).

559 **C.** Signed error ratio after subtracting baseline values for VF trials in the aftereffect phase  
560 for CVF and EPF groups. Insert shows that there was no significant difference between the  
561 two groups (n.s. = not significant).

562 **D.** RVF learning percentage across entire experiment for CVF and EPF groups. Note that  
563 both groups were able to maintain performance accuracy close to 100% from the baseline  
564 to the test phase. Insert shows that learning % at test was significantly higher in the CVF  
565 group compared to the EPF group (\*  $p < 0.05$ ).

566 **E.** Mean RT across entire experiment for CVF and EPF groups. Left box plot shows that  
567 overall RT was significantly slower in the EPF group compared to the CVF group. Right box  
568 plot shows that the CVF group increased their RT on VF trials from the test phase to the  
569 aftereffect phase to a greater extent than the EPF group (\*  $p < 0.05$ , \*\*\* $p < 0.001$ ).

570

571

572 **Discussion**

573 Encountering a change in the environment, humans can maintain their motor  
574 performance by either adapting their sensorimotor representation or by using a  
575 cognitive strategy to compensate for the change (Krakauer et al. 2019; Schween et  
576 al. 2020). We examined if elements of the design of a visuomotor task can facilitate  
577 a cognitive strategy, and whether this in turn enhances the intermanual transfer of  
578 learning. Across two experiments, when the visual feedback of our ballistic force  
579 production task was restricted to the endpoint, reaction times increased, suggesting  
580 a greater reliance on a cognitive strategy to solve the task (Haith et al. 2015; Klapp  
581 1995). Following this pattern, intermanual transfer was facilitated in the endpoint  
582 feedback condition, indicating that a cognitive strategy can facilitate effector  
583 independent learning. We confirmed that EPF promoted strategy use via a second  
584 experiment which found reduced aftereffects relative to CVF.

585 Restricting visual feedback to the endpoint of the task (EPF) has been shown  
586 to facilitate cognitive control (Hinder et al. 2008; Taylor et al. 2014). During prism  
587 adaptation EPF may enhance the generalization of learning across effectors  
588 (Làdavas et al. 2011) and intermanual transfer (Cohen 1967), because it promotes  
589 greater strategic control than continuous visual feedback. Our results support the  
590 view that EPF encourages strategic learning because it involves a single  
591 performance error signal pertaining to goal completion. It therefore encourages  
592 learning at the planning stage, above the level of the control policy (McDougle et al.  
593 2016). Strategic learning and motor adaptation have been suggested to involve  
594 dissociable brain networks (Jahani et al. 2020). The supplementary motor area is  
595 central to strategic control and bimanual tasks (Serrien et al. 2002), making it a likely  
596 candidate region for the processing of EPF and the associated generalizable  
597 learning we observed.

598 Cognitive strategies have always been considered more time consuming than  
599 motor adaptation (Fitts and Posner 1967). During an isometric visual rotation task,  
600 EPF was associated with slower RT, and the introduction of perturbations selectively  
601 slowed responses further under conditions of EPF (Hinder et al. 2008). Other studies  
602 have observed a relationship between cognitive strategy and longer RT (Benson et  
603 al. 2011; Fernandez-Ruiz et al. 2011; Saijo and Gomi 2010). Our results suggest that  
604 longer responding in our task can indicate strategic control throughout the task and  
605 that this form of learning can enhance performance when flexible responding is  
606 required.

607 In our task RT was not manipulated independently of visual feedback type,  
608 meaning that other interpretations of the prolonged RT in the EPF group, such as  
609 task difficulty, could not be completely excluded. It was therefore necessary to verify  
610 that EPF did indeed promote strategy use. In a second experiment we found that,  
611 having learned a gradual decrease of visuomotor gain, participants tended to  
612 overshoot the target after the gain suddenly increased back to baseline levels. These  
613 aftereffects in response to the “switching off” of a perturbation were consistent with  
614 those seen during reaching tasks (Galea et al. 2011; Kitago et al. 2013; Taylor et al.  
615 2013; Taylor and Ivry 2011). Importantly, we found that aftereffect amplitude was

616 markedly reduced in the EPF group relative to the CVF group, consistent with  
617 previous reports finding reduced aftereffects for EPF (Hinder et al. 2008; Barkley et  
618 al. 2014). Aftereffects are a hallmark of motor adaptation and reductions in  
619 aftereffects have previously been found to be caused by the use of cognitive  
620 strategies (Benson et al. 2011; Haith et al. 2015; Morehead et al. 2015). As such,  
621 enhanced intermanual transfer of learning associated with EPF can be ascribed to  
622 greater strategy use.

623 Changing the perturbation schedule from gradual to abrupt did not increase  
624 the RT, an indicator of strategy use, and consequently did not facilitate intermanual  
625 transfer of learning. Previous work indicated abrupt gain changes enhance  
626 intermanual transfer of learning via the facilitation of cognitive strategies (Malfait and  
627 Ostry 2004; Werner et al. 2019), but opposite results also exist (Taylor et al. 2011;  
628 Wang et al. 2011a, 2015). Since this strategy use is assumed to be due to the abrupt  
629 change causing the perturbation to reach explicit 'awareness' (Bouchard and  
630 Cressman 2021; Werner et al. 2019), difficulty in setting the size of the abrupt change  
631 and inter-individual variability in change sensitivity may explain the null-effect in the  
632 present study. In Experiment 1 abrupt gain changes were possibly also less salient  
633 than normal due to the constant switching between response hands. Indeed, in  
634 Experiment 2 we observed some evidence that that an abrupt change in gain  
635 (aftereffect phase) could produce some gradual slowing of RT in the CVF group,  
636 consistent with a slight increase in strategy use at the end of the task.

637 We found transfer percentages of ~85% for EPF, whereas previous motor  
638 tasks report ~25% (Balitsky Thompson and Henriques 2010; Sainburg and Wang  
639 2002; Wang et al. 2011a; Wang and Sainburg 2004a). The disparity may be because  
640 of greater strategy use in our task, but it is also likely because transfer was assessed  
641 continuously, which has been shown to increase transfer rates from the 25% seen  
642 in blocked designs to above 50% (Taylor et al. 2011). Additionally, we used transfer  
643 from RnoVF to LnoVF trials, which controlled for task difficulty across conditions, but  
644 inherently gives larger transfer values than comparing to visual feedback trials.  
645 Caution is therefore required when comparing transfer rates across paradigms. We  
646 also only tested transfer from the right to the left hand. Several studies have reported  
647 that transfer is reduced from the non-dominant to the dominant arm (Criscimagna-  
648 Hemminger et al. 2003; Wang and Sainburg 2004b), while others have found no  
649 such asymmetry (Poh et al. 2016; Stockinger et al. 2015; Wang et al. 2011b). Future  
650 work is needed to address how left to right transfer works during force production  
651 tasks.

652 Motor learning occurs at multiple levels of the control hierarchy (Hikosaka et  
653 al. 1999), with movement planning involving effector dependent and independent  
654 brain regions (Gallivan et al. 2011). Intermanual transfer of learning has generally  
655 been assumed to be achieved by updating such effector independent motor  
656 representations (Ruddy and Carson 2013). However, an effector independent  
657 cognitive control strategy, such as re-aiming (Benson et al. 2011), can achieve the  
658 same result. Future models of intermanual transfer need to consider the role of  
659 cognitive strategies.

660 In conclusion, our results add to the growing body of literature showing that  
661 elements of the task environment, such as the type of visual feedback available, can  
662 alter the balance between cognitive strategies and motor adaptation. The  
663 involvement of a cognitive strategy enhances intermanual transfer of learning. This  
664 greater generalization may result from strategic learning being related to movement  
665 planning, and as such being located above the control policy in the motor hierarchy.

666

667

668 **Conflict of interest statement:** The authors declare no conflicts of interest

669

670 **Author contributions:** JDH, PH, HG, SB, YI and NH conceived of the presented  
671 idea. JDH and NH designed the experiment. JDH and NH collected the data. Data  
672 was analysed by JDH and NH with support from HG. JDH and NH wrote the  
673 manuscript. All of the authors read and commented on the manuscript.

674

675 **Acknowledgements:** None

676

677 **Funding:** JDH was supported by a UCL-NTT Impact studentship and by a NICT  
678 Internship Trainee Program. NH is supported by Japan Society for the Promotion of  
679 Science (Kakenhi 26119535, 18H01106). YI and NH are supported by ERATO  
680 (JPMJER1801).

681

## 682 **References**

683 **Anguera JA, Russell CA, Noll DC, Seidler RD.** Neural correlates associated with intermanual transfer of  
684 sensorimotor adaptation. *Brain Res* 1185: 136–151, 2007.

685 **Balitsky Thompson AK, Henriques DYP.** Visuomotor adaptation and intermanual transfer under different  
686 viewing conditions. *Exp Brain Res* 202: 543–552, 2010.

687 **Barkley V, Salomonczyk D, Cressman EK, Henriques DYP.** Reach adaptation and proprioceptive  
688 recalibration following terminal visual feedback of the hand. *Front Hum Neurosci* 8: 705, 2014.

689 **Benson BL, Anguera JA, Seidler RD.** A spatial explicit strategy reduces error but interferes with  
690 sensorimotor adaptation. *J Neurophysiol* 105: 2843–2851, 2011.

691 **Bond KM, Taylor JA.** Flexible explicit but rigid implicit learning in a visuomotor adaptation task. *J*  
692 *Neurophysiol* 113: 3836–3849, 2015.

693 **Bouchard J-M, Cressman EK.** Intermanual transfer and retention of visuomotor adaptation to a large  
694 visuomotor distortion are driven by explicit processes. *PLoS ONE* 16: e0245184, 2021.

695 **Brainard DH.** The Psychophysics Toolbox. *Spat Vis* 10: 433–436, 1997.

696 **Cohen MM.** Continuous versus terminal visual feedback in prism aftereffects. *Percept Mot Skills* 24:

- 697 1295–1302, 1967.
- 698 **Criscimagna-Hemminger SE, Donchin O, Gazzaniga MS, Shadmehr R.** Learned dynamics of reaching  
699 movements generalize from dominant to nondominant arm. *J Neurophysiol* 89: 168–176, 2003.
- 700 **Fernandez-Ruiz J, Wong W, Armstrong IT, Flanagan JR.** Relation between reaction time and reach errors  
701 during visuomotor adaptation. *Behav Brain Res* 219: 8–14, 2011.
- 702 **Fitts PM, Posner MI.** *Human performance*. Belmont, Calif.: Brooks/Cole Pub. Co., 1967.
- 703 **Fujiwara Y, Lee J, Ishikawa T, Kakei S, Izawa J.** Diverse coordinate frames on sensorimotor areas in  
704 visuomotor transformation. *Sci Rep* 7: 14950, 2017.
- 705 **Galea JM, Vazquez A, Pasricha N, de Xivry J-JO, Celnik P.** Dissociating the roles of the cerebellum and  
706 motor cortex during adaptive learning: the motor cortex retains what the cerebellum learns. *Cereb Cortex*  
707 *N Y N* 1991 21: 1761–1770, 2011.
- 708 **Gallivan JP, McLean DA, Smith FW, Culham JC.** Decoding Effector-Dependent and Effector-Independent  
709 Movement Intentions from Human Parieto-Frontal Brain Activity. *J Neurosci* 31: 17149–17168, 2011.
- 710 **Haith AM, Huberdeau DM, Krakauer JW.** The influence of movement preparation time on the expression  
711 of visuomotor learning and savings. *J Neurosci Off J Soc Neurosci* 35: 5109–5117, 2015.
- 712 **Hikosaka O, Nakahara H, Rand MK, Sakai K, Lu X, Nakamura K, Miyachi S, Doya K.** Parallel neural  
713 networks for learning sequential procedures. *Trends Neurosci* 22: 464–471, 1999.
- 714 **Hinder MR, Tresilian JR, Riek S, Carson RG.** The contribution of visual feedback to visuomotor adaptation:  
715 how much and when? *Brain Res* 1197: 123–134, 2008.
- 716 **Imamizu H, Shimojo S.** The locus of visual-motor learning at the task or manipulator level: implications  
717 from intermanual transfer. *J Exp Psychol Hum Percept Perform* 21: 719–733, 1995.
- 718 **Jahani A, Schwey A, Bernier P-M, Malfait N.** Spatially Distinct Beta-Band Activities Reflect Implicit  
719 Sensorimotor Adaptation and Explicit Re-aiming Strategy. *J Neurosci Off J Soc Neurosci* 40: 2498–2509,  
720 2020.
- 721 **Kawato M.** Internal models for motor control and trajectory planning. *Curr Opin Neurobiol* 9: 718–727,  
722 1999.
- 723 **Kitago T, Ryan SL, Mazzoni P, Krakauer JW, Haith AM.** Unlearning versus savings in visuomotor  
724 adaptation: comparing effects of washout, passage of time, and removal of errors on motor memory.  
725 *Front Hum Neurosci* 7: 307, 2013.
- 726 **Klapp ST.** Motor response programming during simple choice reaction time: The role of practice. *J Exp*  
727 *Psychol Hum Percept Perform* 21: 1015–1027, 1995.
- 728 **Krakauer JW, Hadjiosif AM, Xu J, Wong AL, Haith AM.** Motor Learning. *Compr Physiol* 9: 613–663, 2019.



- 729 **Làdavas E, Bonifazi S, Catena L, Serino A.** Neglect rehabilitation by prism adaptation: different  
730 procedures have different impacts. *Neuropsychologia* 49: 1136–1145, 2011.
- 731 **Malfait N, Ostry DJ.** Is interlimb transfer of force-field adaptation a cognitive response to the sudden  
732 introduction of load? *J Neurosci Off J Soc Neurosci* 24: 8084–8089, 2004.
- 733 **Mazzoni P, Krakauer JW.** An implicit plan overrides an explicit strategy during visuomotor adaptation. *J*  
734 *Neurosci Off J Soc Neurosci* 26: 3642–3645, 2006.
- 735 **McDougle SD, Bond KM, Taylor JA.** Explicit and Implicit Processes Constitute the Fast and Slow Processes  
736 of Sensorimotor Learning. *J Neurosci Off J Soc Neurosci* 35: 9568–9579, 2015.
- 737 **McDougle SD, Ivry RB, Taylor JA.** Taking Aim at the Cognitive Side of Learning in Sensorimotor Adaptation  
738 Tasks. *Trends Cogn Sci* 20: 535–544, 2016.
- 739 **Miyamoto YR, Wang S, Smith MA.** Implicit adaptation compensates for erratic explicit strategy in human  
740 motor learning. *Nat Neurosci* 23: 443–455, 2020.
- 741 **Morehead JR, Qasim SE, Crossley MJ, Ivry R.** Savings upon Re-Aiming in Visuomotor Adaptation. *J*  
742 *Neurosci* 35: 14386–14396, 2015.
- 743 **Pelli DG.** The VideoToolbox software for visual psychophysics: transforming numbers into movies. *Spat*  
744 *Vis* 10: 437–442, 1997.
- 745 **Poh E, Carroll TJ, Taylor JA.** Effect of coordinate frame compatibility on the transfer of implicit and explicit  
746 learning across limbs. *J Neurophysiol* 116: 1239–1249, 2016.
- 747 **Ruddy KL, Carson RG.** Neural pathways mediating cross education of motor function. *Front Hum Neurosci*  
748 7: 397, 2013.
- 749 **Saijo N, Gomi H.** Multiple motor learning strategies in visuomotor rotation. *PLoS One* 5: e9399, 2010.
- 750 **Sainburg RL, Wang J.** Interlimb transfer of visuomotor rotations: independence of direction and final  
751 position information. *Exp Brain Res* 145: 437–447, 2002.
- 752 **Schween R, McDougle SD, Hegele M, Taylor JA.** Assessing explicit strategies in force field adaptation. *J*  
753 *Neurophysiol* 123: 1552–1565, 2020.
- 754 **Serrien DJ, Strens LHA, Oliviero A, Brown P.** Repetitive transcranial magnetic stimulation of the  
755 supplementary motor area (SMA) degrades bimanual movement control in humans. *Neurosci Lett* 328:  
756 89–92, 2002.
- 757 **Stockinger C, Thüerer B, Focke A, Stein T.** Intermanual transfer characteristics of dynamic learning:  
758 direction, coordinate frame, and consolidation of interlimb generalization. *J Neurophysiol* 114: 3166–  
759 3176, 2015.
- 760 **Taylor JA, Hieber LL, Ivry RB.** Feedback-dependent generalization. *J Neurophysiol* 109: 202–215, 2013.

- 761 **Taylor JA, Ivry RB.** Flexible cognitive strategies during motor learning. *PLoS Comput Biol* 7: e1001096,  
762 2011.
- 763 **Taylor JA, Ivry RB.** The role of strategies in motor learning. *Ann N Y Acad Sci* 1251: 1–12, 2012.
- 764 **Taylor JA, Krakauer JW, Ivry RB.** Explicit and implicit contributions to learning in a sensorimotor  
765 adaptation task. *J Neurosci Off J Soc Neurosci* 34: 3023–3032, 2014.
- 766 **Taylor JA, Wojaczynski GJ, Ivry RB.** Trial-by-trial analysis of intermanual transfer during visuomotor  
767 adaptation. *J Neurophysiol* 106: 3157–3172, 2011.
- 768 **Wang J, Joshi M, Lei Y.** The extent of interlimb transfer following adaptation to a novel visuomotor  
769 condition does not depend on awareness of the condition. *J Neurophysiol* 106: 259–264, 2011a.
- 770 **Wang J, Lei Y, Binder JR.** Performing a reaching task with one arm while adapting to a visuomotor rotation  
771 with the other can lead to complete transfer of motor learning across the arms. *J Neurophysiol* 113: 2302–  
772 2308, 2015.
- 773 **Wang J, Przybyla A, Wuebbenhorst K, Haaland KY, Sainburg RL.** Aging reduces asymmetries in interlimb  
774 transfer of visuomotor adaptation. *Exp Brain Res* 210: 283–290, 2011b.
- 775 **Wang J, Sainburg RL.** Mechanisms underlying interlimb transfer of visuomotor rotations. *Exp Brain Res*  
776 149: 520–526, 2003.
- 777 **Wang J, Sainburg RL.** Limitations in interlimb transfer of visuomotor rotations. *Exp Brain Res* 155: 1–8,  
778 2004a.
- 779 **Wang J, Sainburg RL.** Interlimb transfer of novel inertial dynamics is asymmetrical. *J Neurophysiol* 92:  
780 349–360, 2004b.
- 781 **Wang J, Sainburg RL.** Interlimb transfer of visuomotor rotations depends on handedness. *Exp Brain Res*  
782 175: 223–230, 2006.
- 783 **Werner S, Strüder HK, Donchin O.** Intermanual transfer of visuomotor adaptation is related to awareness.  
784 *PloS One* 14: e0220748, 2019.
- 785
